# Supplementary material
Source: PubMed Central journal article supplement (PMC3574912)
Supplement: 1212646110_sapp.pdf [file 1212646110_sapp.pdf]

## Supporting Information Appendix

Supporting Information Corrected January 23, 2013

### Mars 520-d mission simulation reveals protracted crew hypokinesia and alterations of sleep duration and timing

Mathias Basner,<sup>1†</sup> David F. Dinges,<sup>1†</sup> Daniel Mollicone,<sup>2</sup> Adrian Ecker,<sup>1</sup>  
Christopher W. Jones,<sup>1</sup> Eric C. Hyder,<sup>1</sup> Adrian Di Antonio,<sup>1</sup> Igor Savelev,<sup>3,4</sup> Kevin  
Kan,<sup>2</sup> Namni Goel,<sup>1</sup> Boris V. Morukov,<sup>5</sup> Jeffrey P. Sutton<sup>4,6</sup>

#### Affiliations:

<sup>1</sup>Division of Sleep and Chronobiology, Unit for Experimental Psychiatry, Department of Psychiatry, Perelman School of Medicine, University of Pennsylvania, Philadelphia, PA, USA  
1013 Blockley Hall, 423 Guardian Drive, Philadelphia, PA, 19104

<sup>2</sup>Pulsar Informatics, Philadelphia, PA, USA.  
3401 Market Street, Suite 318, Philadelphia, PA 19104

<sup>3</sup>Human Performance and Engineering Division, Wyle, Houston, TX, USA.  
1290 Hercules Drive, Houston, TX 77058

<sup>4</sup>National Space Biomedical Research Institute, Houston, TX, USA.  
6500 Main Street, Suite 910, Houston, TX 77030

<sup>5</sup>Institute for Biomedical Problems, Moscow, Russia.  
76A Khoroshevskoye Shosse, Moscow, Russia 123007

<sup>6</sup>Center for Space Medicine and Department of Medicine, Baylor College of Medicine, 6500 Main Street, Suite 910, Houston, TX, USA, 77030

#### Materials, Methods, Results

Figs. S1 to S7  
Tables S1 to S7

#### ACCESS TO DATA

The data reported in this paper are deposited in a Microsoft Excel file. To access the data: i) Go to the [http://www.med.upenn.edu/uep/user\\_documents/PNAS\\_Basner\\_et\\_al.xlsx](http://www.med.upenn.edu/uep/user_documents/PNAS_Basner_et_al.xlsx). ii) When the “Save File” window appears, choose a destination location to save the file.

## MATERIAL AND METHODS

### Mars 520-day simulation.

The State Scientific Center of the Russian Federation – Institute for Biomedical Problems (IBMP) of the Russian Academy of Sciences (RAS) performed the Mars 500 project, which consisted of three isolation studies with six crewmembers each: a 14-day pilot study (completed in November 2007), a 105-day pilot study (completed in July 2009), and the main 520-day study simulating a mission to Mars (completed in November 2011). The high fidelity of the simulation to actual spaceflight was reflected in the following features of the experiment: (i) a multinational crew of N=6 healthy adult male volunteers selected by the Russian Federation (N=3), the European Space Agency (N=2), and the China National Space Administration (N=1), who were trained together and who were similar in age, careers, and education (e.g., engineers, physicians, military backgrounds) to astronauts/cosmonauts living on the International Space Station (ISS); (ii) 520 consecutive days of confinement (3 June 2010 to 4 November 2011) in a pressurized facility with a volume and configuration comparable to a spacecraft with

interconnected habitable modules; (iii) facility modules equipped with life support systems and an artificial atmospheric environment at normal barometric pressure; (iv) activities that simulate aspects of the International Space Station with daily maintenance work, scientific experiments, and exercise; (v) isolation from Earth's daily environmental light-dark cycles, temperatures and seasonal conditions; (vi) a realistic Mars flight simulation based in orbital mechanics and under the direction of mission controllers; (vii) work throughout the 520-day mission included both routine and simulated emergency events; (viii) changes in communication modes and time delays that would occur in transit to and from Mars; (ix) limited consumable resources (food and water); and (x) the crew awareness of frequent publicity of the mission by media and the public. The crew lived on a 5-day work cycle, with two days off, except for simulation of special situations (e.g., emergencies). Fig. S1 displays the physical features of the mission facility.

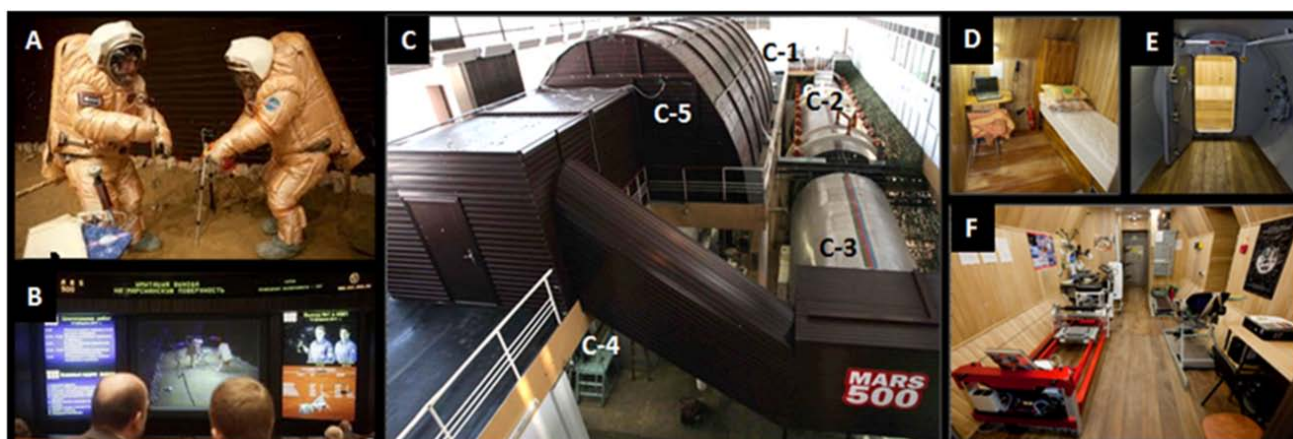

**Fig. S1.** The MARS 500 simulated spaceflight facility was developed by the Russian Federation – Institute for Biomedical Problems of the Russian Academy of Sciences (RAS) under the aegis of Roscosmos and RAS. The isolation facility was located on the IBMP site in Moscow in a building also containing the mission control operations room and technical facilities. The spaceflight habitat was a 550m<sup>3</sup> isolation facility composed of four hermetically-sealed, interconnected habitat modules and one external module, used to simulate the Martian surface ([http://mars500.imbp.ru/en/index\\_e.html](http://mars500.imbp.ru/en/index_e.html)). The facility and mission control center outside the facility were designed to provide experimental data on crew health and working capacity while the crew lived in a confined environment during simulation of the main operational, environmental and behavioral features of a 520-day roundtrip mission to Mars. Midway through the 520-day mission, at the simulated arrival in Mars orbit (i.e., a 30-day Mars orbiting phase), three crewmembers landed on the Mars surface (A), while the remaining three crewmembers in the MARS 500 chamber, as well as mission control (B), observed and directed their activities. The exterior of the IBMP MARS 500 facility used for the simulated mission is shown in (C). C-1 was the location of a medical module that housed a habitable compartment, areas for working with medical equipment, kitchen-dining room, and lavatory. C-2 was a habitable module consisting of six crew compartments for sleep and privacy (D), community room, main console, kitchen, and lavatory. Module C-3 served as the simulator for the Mars landing. Module C-4 underneath the Mars surface housed an exercise facility (F), a greenhouse for plants, storage for resources, refrigerator, thermal chamber, and a lavatory. The four habitable modules were interconnected by corridors (E). The 50 m<sup>3</sup> Mars landing simulator module (C-3) was used only during the 30-day Mars orbiting phase (mission days 244-273). It accommodated three crewmembers and was equipped with a video control and communications system, gas analysis system, air-conditioning and ventilation systems, sewage system and water supply, fire alarm and suppression system, and transfer tunnels connected to the habitable module and into the chamber of the Martian surface simulator. The external Martian surface simulation module (C-5) was a 1200 m<sup>3</sup> unsealed chamber designed for crew exploration in space suits. It had storage for space suits, sealed stairs and a caisson separating it from the Mars landing simulator module. Photos (A) and (C) courtesy of European Space Agency ([www.esa.int/specials/Mars500/](http://www.esa.int/specials/Mars500/)). Photos (B), (D), (E), and (F) courtesy of IBMP (<http://mars500.imbp.ru/en/gallery/html>).

**Table S1.** Description of crewmembers by age at the start of the mission.

| National self-identity | Mission role    | Gender | Age | Professional experience                                                                                                                       |
|------------------------|-----------------|--------|-----|-----------------------------------------------------------------------------------------------------------------------------------------------|
| Russian                | Crew Commander  | Male   | 38  | Naval engineer; prior space analog experience; trained cosmonauts on extra-vehicular activity (EVA) in conditions of simulated weightlessness |
| Russian / Tadjikistan  | Physician       | Male   | 37  | Military physician surgeon                                                                                                                    |
| Russian                | Researcher      | Male   | 32  | Military physician and physiologist; research in aviation, space medicine, and military ergonomics                                            |
| French                 | Flight Engineer | Male   | 31  | Engineer                                                                                                                                      |
| Italian / Colombian    | Researcher      | Male   | 27  | Engineer; prior space analog experience                                                                                                       |
| Chinese                | Researcher      | Male   | 27  | Physician; Chinese astronaut trainer                                                                                                          |

**Mission crew.**

All crewmembers participating in the Mars 520-day simulation signed informed consents approved by the Institutional Review Board of the University of Pennsylvania, Philadelphia, Pennsylvania, USA. They were compensated for their participation in the study, and they were free to discontinue the study at any time. The volunteer crewmembers revealed their identities before the mission. To ensure the confidentiality of the crew relative to the data acquired and reported in this manuscript, results were de-identified and crewmembers were randomly assigned alphabetic letters (*a-f*). To further ensure crew confidentiality relative to the results, no data were reported relative to crewmembers' nationalities, ages, professions, or roles in the mission. The summary descriptions in Table S1 of each of the N=6 crewmembers show nationality; official role in mission; gender; age at time of mission initiation; and professional background. The information was derived from a publicly available IBMP document ([http://mars500.imbp.ru/en/520\\_crew.html](http://mars500.imbp.ru/en/520_crew.html)).

Table S2 lists some of the key milestones in the timeline of the 520-day simulation, which included the simulation of communication delays ranging from 8 s to 736 s between mission days 54 and 470, a Mars landing, and extra-vehicular activities (EVAs) on a simulated Mars surface between days 257 and 265. A total of 91 experiments were conducted throughout the mission, which included experiments in the areas of physiology (N=20), psychology (N=21), biochemistry, immunology, and biology (N=34), microbiology (N=8), and operations and technology (N=8). Not all of the experiments required the crew's active participation. Sampling frequency ranged between experiments from three times during the mission to continuously throughout the mission, with most of the studies sampling data on a regular but discontinuous basis (e.g., once every 30 days). The majority of the projects were of Russian

origin, while 14% were supported by the European Space Agency (ESA), and 16% by other individual countries.

**Experimental procedures and measurements.**

**Actigraphy.** Wrist actigraphy is a reliable, non-invasive method to validly assess rest-activity cycles (1). Throughout the 520-day simulated mission to Mars, each crewmember continuously wore a watch-like, wristwatch size actigraph (Actiwatch Spectrum, Philips/Respironics) on the wrist of the non-dominant arm. The device measured both average white light intensity (illuminance in lux) and a calibrated activity level from movement-induced accelerations of the wrist. It also displayed clock time. Actigraphs were exchanged twice for each crewmember throughout the mission before the batteries in the currently used model dissipated. Each actigraph contained a piezo-electric sensor that generated voltage when the device underwent a change in acceleration. The voltage generated by the sensor was amplified and filtered by analog circuitry. This filtered and amplified voltage was then passed into an analog to digital (A/D) converter within a microprocessor to create a digital value. This A/D conversion and the following operations were repeated 32 times per second (32 Hz) or every 31.25 ms, the digital value is used to adjust a running baseline value. This makes it possible for the actigraph to effectively filter out constant accelerations, such as gravity. The current digital value is compared to the baseline value. The maximum deviation from baseline within 32 samples (1 s) is the activity value for that second. Hence the actigraph determines the peak or maximum acceleration change that occurred in each second. In the Mars 520-day study, actigraphs were set to record one activity value per minute (i.e., the resulting peak activity values from 60 consecutive seconds were added to an accumulated activity count). To minimize inter-sensor

**Table S2.** Timeline of the Mars 520-day study.\*

| Date                   | DiM <sup>#</sup> | Event                                                               |
|------------------------|------------------|---------------------------------------------------------------------|
| 06/03/2010             | 1                | Hatch closed, lift off                                              |
| 06/15/2010             | 13               | Undocking from orbital assembly laboratory                          |
| 06/23/2010             | 21               | Transfer to heliocentric orbit towards Mars                         |
| 07/26/2010             | 54               | Start of communications delay                                       |
| 12/24/2010             | 205              | Shifting to spiral orbit towards Mars                               |
| 02/01/2011             | 244              | Entering circular orbit around Mars, Mars Lander hatch opening      |
| 02/08/2011             | 251              | Completion of loading, Lander hatch closure                         |
| 02/12/2011             | 255              | Undocking, landing on Mars                                          |
| 02/14 to<br>02/22/2011 | 257-265          | Egresses on Martian surface                                         |
| 02/23/2011             | 266              | Ascent, beginning of quarantine                                     |
| 02/24/2011             | 267              | Docking with interplanetary craft                                   |
| 02/26/2011             | 269              | End of quarantine                                                   |
| 02/27/2011             | 270              | Habitation module hatch opening, Crew transfer to Habitation module |
| 03/01/2011             | 272              | Hatch closure, Lander undocking                                     |
| 03/02/2011             | 273              | Entering into spiral orbit away from Mars                           |
| 04/07/2011             | 309              | Transfer to heliocentric orbit towards Earth                        |
| 04/25/2011             | 327              | Start of 1-week crew autonomy drill                                 |
| 05/19/2011             | 351              | Maximum communication delay of 12 min 16 sec                        |
| 09/15/2011             | 470              | End of communications delay, switchover to voice communications     |
| 10/13/2011             | 498              | Shifting to spiral orbit towards Earth                              |
| 11/04/2011             | 520              | End of 520-day study, crew landing on Earth                         |

\*Source: [http://www.esa.int/SPECIALS/Mars500/SEMGX9U889G\\_0.html](http://www.esa.int/SPECIALS/Mars500/SEMGX9U889G_0.html)); <sup>#</sup>days in mission

variation, each actigraph underwent an activity calibration procedure to normalize data compared between watches. This calibration procedure was carried out by the manufacturer and resulted in a calibration constant that was programmed into the actigraph device. This calibration constant was applied to the raw values to generate calibrated activity data.

Both mission control and the crew adhered to daylight savings times. In Moscow, time was delayed by 1 hour on the last Sunday of October 2010 at 03:00 local time and advanced by 1 hour on the last Sunday in March 2011 at 02:00 local time. The Russians changed their daylight savings rules and remained with summer time in 2011 (i.e.,

the time was not delayed in October 2011). Laptops provided by the University of Pennsylvania automatically applied the daylight savings time change at the time of the next data download. Therefore, some of the files required manual correction. We added or deleted 1 hour of data not at the time the clocks were advanced or delayed (i.e., 2 am or 3 am local time), but after subjects woke up in the morning on the same day. As there was no Internet connection inside the chamber, the laptops did not reflect the change in the new daylight savings policy adopted in Russia in October 2011 (i.e., time was automatically delayed by one hour). This was also corrected manually.

**Table S3.** Typical workday during the Mars 520-day simulation.\*

| Time Period | Activity                                                                            |
|-------------|-------------------------------------------------------------------------------------|
| 8:00-9:30   | Personal hygiene, breakfast                                                         |
| 9:30-10:00  | Operative meeting                                                                   |
| 10:00-11:30 | Facility inspection, familiarization with and preparation of scientific experiments |
| 11:30-13:30 | Operative work                                                                      |
| 13:30-14:30 | Lunch                                                                               |
| 14:30-19:30 | Implementation of scientific experiments and physical training                      |
| 19:30-23:30 | Supper and personal time                                                            |
| 23:30-8:00  | Sleep period                                                                        |

\*Source: [http://mars500.imbp.ru/en/520\\_one\\_year.html](http://mars500.imbp.ru/en/520_one_year.html)

#### Actigraphy scoring of active wake, rest, sleep.

Actigraphy 1-min epochs were automatically classified into active wake, sleep, or waking rest based on a proprietary algorithm (Respironics Actiware, Version 5.59.0015, standard settings). Results of the algorithm scoring were visually examined. In rare cases in which routine visual inspection of data revealed obvious misclassification of state by the automated actigraph algorithm (e.g., sleep scored during active wakefulness), the automatic scoring was corrected. Less than 2.8% (range across subjects = 0.8%-5.2%) of the automatic scoring required correction in this manner. Epochs with off-wrist or missing data (due to data downloads or equipment failure) were classified accordingly. The six crewmembers started wearing the actiwatches on average at 13:46 (range 10:28-14:46) on the first mission day and stopped wearing them on average at 18:02 (range 17:57-18:08) on the last mission day. Mission days 1 and 520 were therefore excluded from actigraphy analyses because these were less than full days and the total time recorded on these two days varied among crewmembers. We also had to delete one hour of valid actigraphy data per crewmember to adjust for daylight savings times (see above). We thus expected 4,485,336 minutes (74,755.6 hours) of actigraphy data for all crewmembers while they lived in the facility (Fig. S1) throughout the 520-day study. We collected a total of 4,396,333 minutes (73,272.2 hours) of valid actigraphy, totaling 98.02% of the expected actigraphy data (i.e., 1.98% of the expected actiwatch data were off-wrist or missing, with a range of 0.5% to 6.0% across the six crewmembers). Analyses of the final actigraphy data set attributed 63.8% of the recorded data to active wakefulness, 31.0% to sleep, and 5.3% to waking rest. Actigraphy counts were also evaluated for the intensity of activity for each 24 h period during the mission and in each of the three states. For the descriptive and statistical analyses related to wake time, sleep time, rest time, activity, and light intensity, off-wrist or missing epochs were imputed with averages of non-missing epochs calculated for each crewmember, each mission quarter, and each of the 1440 minutes of the day. For analyses related to activity or light intensity by behavioral state (i.e., wake, sleep, rest), missing data were not imputed.

#### Validation study of the Actiwatch algorithm for state classification.

To validate the accuracy of the Actiware classification algorithm for active wake, rest and sleep we used an experiment involving N=22 healthy adults (mean age  $35.1 \pm 9.0$  y [SD]), which is not significantly different from the 520-day mission crew mean age  $32.0 \pm 4.7$  y), who were monitored actigraphically while living in an environmentally isolated laboratory for 15 days each (total of 330 days). The laboratory confinement mimicked the mission confinement of the crew. We used a scheduled 16:8 wake:sleep ratio each day, which approximates the daily schedule of the 520-day mission crew (Table S3). Objective documentation (i.e., validation criteria) of wakefulness was accomplished by continuous behavioral monitoring of subjects, while physiological sleep and wakefulness were verified by polysomnography (PSG) during scheduled daily 8-hour sleep periods. The N=22 subjects had 115 days in the laboratory during which both behavioral monitoring and PSG were available for validation of the Actiwatch algorithm (i.e., permitting a 24-h validation). Actigraphy data were scored blind to validating criteria using the same algorithm scoring procedures used in the 520-day mission simulation (i.e., 1-min epochs from noon to noon each day).

The validation results confirmed the utility of the Actiwatch and its activity scoring algorithm. When wakefulness was objectively known to be present (by behavioral observation and/or PSG), the Actiwatch algorithm correctly classified wakefulness 96.2% of the time (i.e., 94.8% active wakefulness and 1.4% as waking rest). Similarly, when sleep was objectively verified to be present by PSG, the Actiwatch algorithm correctly classified sleep 97.0% of the time. The Actiwatch algorithm 3.0% misclassification error was divided between waking rest (1.4%) and active wakefulness (1.6%). Therefore the Actiwatch algorithm detection sensitivity (for sleep) was 97.0%, while specificity (for wakefulness) was 96.2%, and overall accuracy of the Actiwatch algorithm was 96.4%.

When validation analyses were confined to only 8-h time-in-bed periods for sleep, and PSG was used as the validation criterion, the algorithm had 97.0% sensitivity, 46.4% specificity, and 89.9% accuracy. The reduced specificity for sleep was due primarily to the algorithm

overestimating sleep when subjects were resting but awake, including lying in bed awake before sleep onset or after awakening spontaneously from sleep before termination of the sleep period. Actiwatch sleep time overestimated PSG sleep time in the validation study by 26.4 min per sleep period (95% CI 18.0-34.8 min;  $P < 0.0001$ ). Actigraphic overestimation of sleep time has been reported in another validation study of actigraphically-scored sleep in healthy adults (2).

Approximately half of the small classification error rate of the Actiwatch algorithm involved a misclassification between waking rest and sleep (Fig. S2), both of which are sedentary states with parallel profiles across the 520-day mission (Fig. 1). That is, increases in both waking rest and sleep time (as sedentary states) occurred within time in mission until the final month of the mission. The algorithm scoring error between these two sedentary states would be secondary (constant) error variance across the mission. Consequently, the validation study supports the acceptably high accuracy of the Actiwatch algorithm classifications of wake and sleep in confined healthy adults, and supports the validity of its use in the 520-day mission crew.

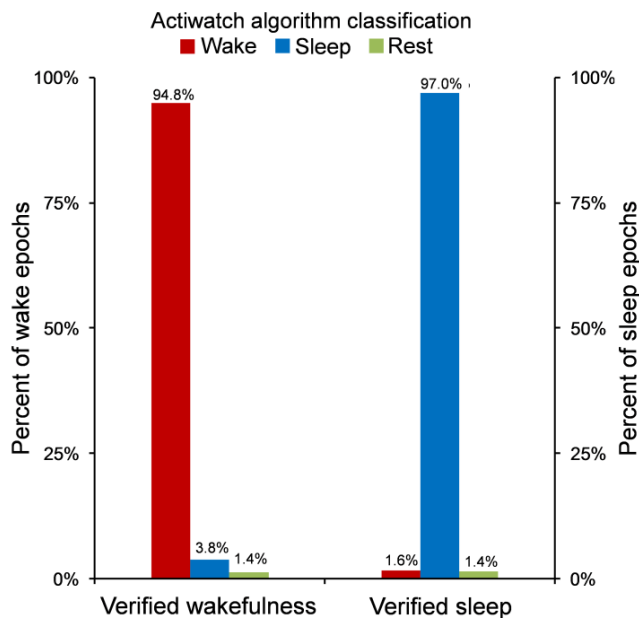

**Fig. S2.** Accuracy of the Actiwatch sleep-wake algorithm classification used in the 520-day simulated Mars mission was validated against continuous behavioral monitoring and polysomnography (PSG) during 24-h (noon to noon) periods in  $N=22$  healthy adults. These subjects lived on a daily 16:8 h (wake:sleep) ratio, in a confined and environmentally isolated laboratory. They had a total of 115 days (165,600 min) during which both behavioral monitoring and PSG were available for validation of the Actiwatch algorithm state score. In a double-blind analysis of the validation data, the Actiwatch algorithm correctly identified wakefulness in 96.2% of epochs in which wakefulness (active or rest) was objectively verified. It correctly identified sleep in 97.0% of epochs in which sleep was objectively verified by PSG. Thus it misclassified only 3.0% of sleep as wake, and 3.8% of wake as sleep.

We do not consider this Actiwatch algorithm classification error rate to pose a significant confound in the data from the 520-day simulation, because it affects only a small portion of the data, and because it is primarily a misclassification between waking rest and sleep, both of which are sedentary states with parallel profiles across the 520-day mission (Fig. 1). That is, increases in both waking rest and sleep time (as sedentary states) occurred within time in mission until the final month of the mission. There is no evidence for or reason to expect that the Actiwatch misclassification error changed across time in mission (i.e., it is secondary error variance). Consequently, the validation study supports the accuracy of the Actiwatch algorithm classifications in the 520-day mission crew.

**Spectrographic analyses of actigraphy data.** These analyses were performed on 1-min epochs to determine the predominant periodicity of sleep-wake timing for each of the subjects. The period was estimated based on the power spectral density of each subject's actigraphy time series data. Sleep-wake time series data were assigned a value of one for all epochs marked as sleep and zero for all other times (i.e., active wake and wake rest). The power spectrum of the sleep-wake time series was estimated for each subject using the periodogram method (3) of multiplying the data with a 90-day rectangular window and taking the squared magnitude of the discrete time Fourier transform. The peak frequency was estimated by using a three-point quadratic interpolation based on the log-magnitudes of the periodogram at the frequency corresponding to the maxima in the periodogram and the two neighboring points.

**Psychomotor Vigilance Test (PVT-B).** The PVT measures sustained or vigilant attention by recording response times (RT) to visual stimuli that occur at random inter-stimulus intervals (ISI). Changes in vigilant attention as measured by the PVT are among the most sensitive indices of shifts in behavioral alertness (4), but this does not reflect all aspects of cognitive performance sensitive to sleep loss (5). The PVT has a number of advantages over other performance measures in that it has negligible aptitude and learning effects (4, 6). Acute total sleep deprivation, chronic sleep restriction, and time on task induce reliable changes in PVT performance, causing an overall slowing of response times, a steady increase in the number of errors of omission (i.e., lapses of attention), and an increase in errors of commission (i.e., responses without a stimulus, or premature responses). To increase the Mars mission crew acceptance and adherence to completing the PVT, we used a briefer, modified 3-minute version of the PVT (i.e., PVT-B), which was recently validated against the standard 10-minute PVT (7) and shown to predict performance on a simulated luggage screening task (8). Once per week, each crewmember performed two PVT-B performance tests (once in the morning after waking up and once in the evening) to assess the effects of potential changes in sleep-wake behavior. Each crewmember performed the PVT on a different day of the week. The tests were conducted using a calibrated laptop computer (Pulsar Informatics, Inc.). Subjects were instructed to monitor a red rectangular box on

the computer screen, and press the space bar as soon as a yellow stimulus counter appeared, which stopped the counter and displayed the RT in milliseconds for a 1-s period. ISIs varied randomly from 2 to 5 s. Subjects were instructed to press the button as soon as each stimulus appeared, in order to keep the RT as low as possible, but not to press the button prematurely (which yielded a false start warning on the display). Performance outcome measures extracted from the task included mean response speed (i.e., reciprocal reaction time,  $1/RT$ ), the number of errors of omission (i.e., lapses of attention defined as  $RT \geq 355$  ms threshold), the number of errors of commission (i.e., false starts defined as  $RT < 130$  ms threshold), and the number of total errors (i.e., the sum of errors of omission and commission) (9). Subjects were provided with feedback on their performance after each test bout. Data acquisition for the PVT-B resulted in  $N=888$  completed tests, which was 100% of the expected data (i.e., six crewmembers assessed two times [a.m. and p.m.] once in each of 74 mission weeks).

**Subjective ratings.** Immediately prior to and/or following each PVT-B test bout, the crewmembers filled out several computerized questionnaires and rating scales (all instructions and questionnaires were translated into Russian for the Russian crewmembers). Crewmembers indicated their current status on 100-mm visual analogue scales with the following binary anchors: good sleep quality, poor sleep quality (morning only); high workload, low workload (evening only); and high tiredness, low tiredness (evening only). Immediately after each PVT-B test bout, crewmembers indicated whether or not it was difficult to perform the PVT, and if so, for what reasons. Data acquisition for subjective ratings resulted in 100% completed tests (i.e.,  $N = 444$ ) for workload ratings and sleep quality ratings.

**Video of the face.** Facial videos were recorded at 30 frames per second from crewmembers during each 3-min PVT-B test using the integrated laptop camera. These videos were evaluated by human raters for slow eyelid closures (PERCLOS) indicative of sleepiness (10). Data acquisition for videos of the face resulted in 100% complete data.

**Quality control of data acquisition.** PVT-B and subjective rating data were time stamped, encrypted and saved on the hard drive of each crewmember's data acquisition computer. Weekly, following the evening PVT-B performance, each crewmember downloaded the actigraphy data of the past week together with the PVT-B performance file, subjective responses, and video data from their computers to an SD memory card. This download also included data from these measures for all previous weeks. The SD cards were jettisoned from the Mars 500 facility weekly. The cards were retrieved and the data downloaded to a secure eRoom and immediately checked by the programmed algorithms (Pulsar Informatics, Inc.) and by investigators at the University of Pennsylvania for data completeness and integrity.

## Data Analyses.

**Statistical analyses.** Mixed model ANOVAs (Proc Mixed, SAS Institute, Version 9.3) with a random intercept for crewmembers and unstructured covariance were performed with 130-day mission quarters (MQ) as the only explanatory variable (MQ1, days 1-130; MQ2, days 131-260; MQ3, days 261-390; MQ4, days 391-520). Analyses by mission quarter are a conventional way in which changes during long-duration missions are evaluated. PVT-B lapses and false starts were transformed with a square root transform prior to analysis to better reflect a normal distribution. If a type 3 test indicated a significant MQ effect ( $P < 0.05$ ), post-hoc t-tests comparing individual mission quarters were performed. For variables that were sampled twice daily (e.g., PVT-B outcomes), the models were also controlled for administration time (morning or evening). Figures 1, S3, S4 and S5 graphically present the findings of these analyses. Significant ( $P < 0.05$ ) post-hoc tests are indicated with asterisks (\* $P < 0.05$ , \*\* $P < 0.01$ , \*\*\* $P < 0.001$ , \*\*\*\* $P < 0.0001$ ). For figure S3, the day was divided into nocturnal (22:00 - 08:59) and diurnal (09:00 - 21:59) periods. All statistical tests were two-tailed.

For Figures 1A and 1C, we averaged the outcome variable across subjects for each mission day before plotting them. The red trend lines represent 4<sup>th</sup> order polynomials. We displayed the 4<sup>th</sup>-order polynomial fit to the data because there was no substantial increase in adjusted  $R^2$  values (calculated with Proc REG in SAS) for higher-order polynomials.

To create the bar graph shown in Fig. S7C, we compared actigraphy measures across subjects on a minute per minute basis. One minute epochs that were classified as missing or off-wrist for at least one crewmember were excluded from the analysis for all crewmembers (86,068 minutes or 11.5% of the 520-day period had at least 1 minute of missing data in one of the crewmembers). For each crewmember, those minutes were counted where the crewmember was either the only crewmember sleeping (black bars in Fig. S7C) or the only crewmember awake (white bars in Fig. S7C). The ordinate in Fig. S7C shows cumulative time for both categories corrected for the amount of missing data. The percentage value indicated above each bar was also corrected for missing data and is therefore relative to the full 520-day mission.

## Results

**Diurnal and nocturnal sleep-wake states.** Figure S3 presents analyses by mission quarter of the time the crew averaged in each active wakefulness, sleep and rest during nocturnal (22:00-08:59) and diurnal (09:00-21:59) segments of the day, as well as light exposure in discrete behavioral states. Nocturnal (Fig. S3A) and diurnal (Fig. S3B) graphs for wake, sleep and rest show profiles similar to those for 24-h periods (Fig. 1B-D and 1F-H).

**Light exposure during diurnal and nocturnal periods.** Light intensity as measured by the wrist actiwatch declined across mission quarters during the diurnal (09:00-21:59) segment of the day (F test,  $P < 0.0001$ ) in a manner identical to the results (post-hoc t-tests) for active wakefulness

depicted in Fig. S3C. Light intensity during the nocturnal (22:00-08:59) segment showed a nearly identical profile across mission quarters (F test,  $P < 0.0001$ , two-tailed). The maximum light exposures to which crewmembers were exposed to at the wrist were as follows: 10% of mission wake time they were exposed to a light intensity of at least 177 lux; 1% of mission wake time they were exposed to a light intensity of at least 412 lux; 0.1% of mission wake time they were exposed to a light intensity of at least 756 lux; and

0.05% of mission wake time they were exposed to a light intensity of at least 981 lux. Thus, 90% of mission wake time crewmembers were exposed to light intensity below 177 lux. Moreover, the facility lighting had a spectral power distribution consistent with fluorescent lighting (Fig. S6) with low irradiance in the 446-477 nm wavelength region of the photon spectrum, which is the most potent region for synchronizing or phase shifting circadian rhythms of sleep and waking.

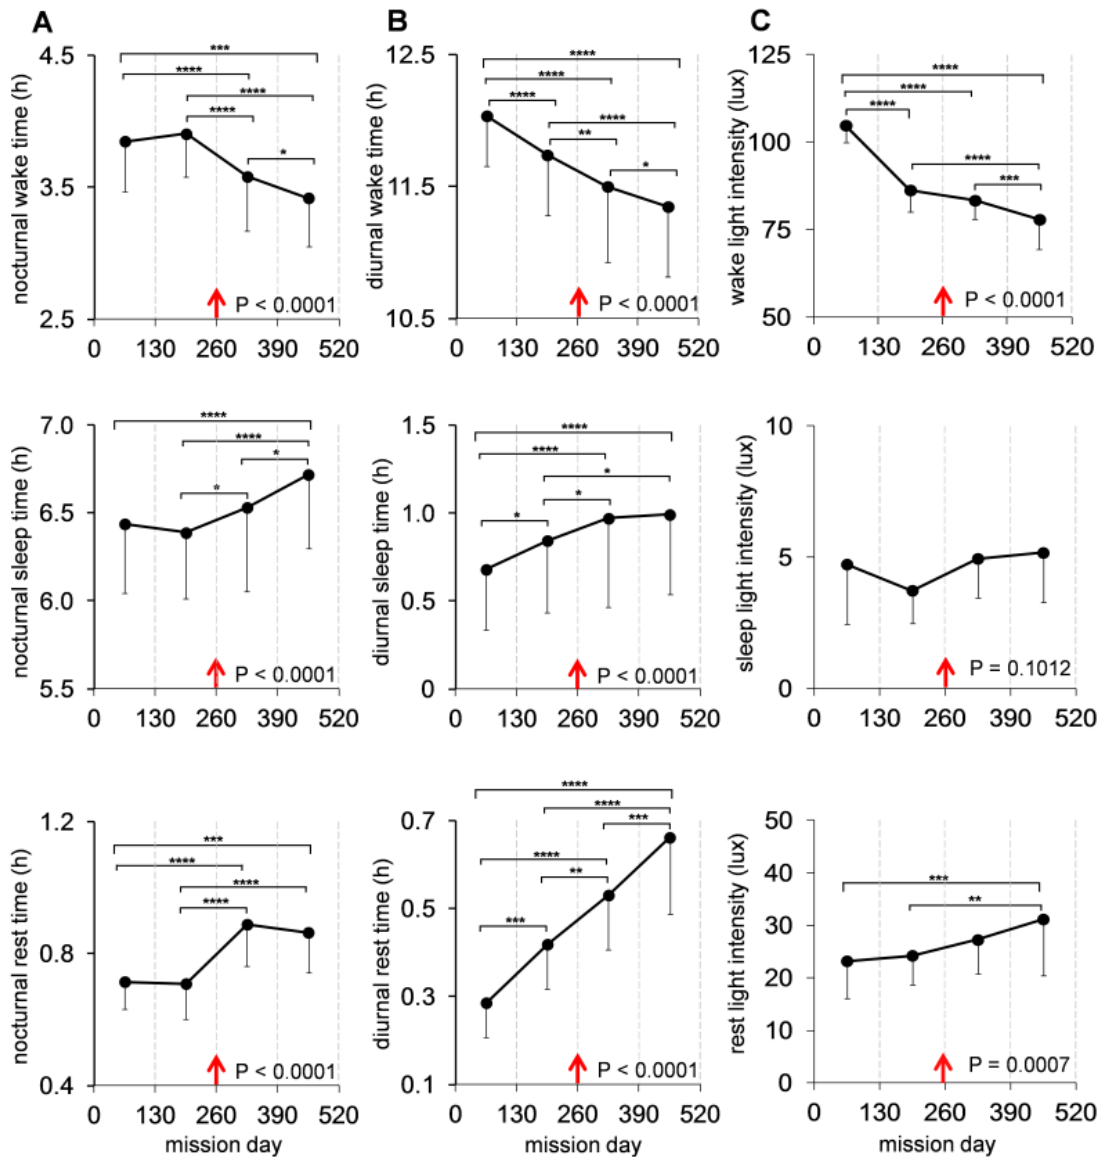

**Fig. S3.** Time (h) the crew averaged in each of three behavioral states during nocturnal (22:00-08:59) and diurnal (09:00-21:59) segments of the day, as well as light exposure in discrete behavioral states, as a function of mission quarter (mean, SE). The simulated mid-mission landing on Mars is indicated by a red arrow. **(A)** During the nocturnal period active wake time decreased, while sleep time and rest time both increased significantly across mission quarters (all F tests,  $P < 0.0001$ , post-hoc tests between quarters:  $*P < 0.05$ ,  $**P < 0.01$ ,  $***P < 0.001$ ,  $****P < 0.0001$ ). **(B)** During the diurnal period active wake time decreased, while sleep time and rest time both increased significantly across mission quarters (all F tests,  $P < 0.0001$ ). **(C)** Light intensity (measured by actiwatch) during active wakefulness for the 24-h day decreased significantly across mission quarters (F test,  $P < 0.0001$ ). Light intensity did not change during sleep across mission quarters, but it increased significantly in the final quarter during rest (F test,  $P < 0.0007$ ).



A separate ESA-sponsored experiment that occurred late in the mission (days 439-499) involved scheduled exposure of crewmembers to blue light (daily from circa 08:00-19:00) and the use of red-tinted glasses. The results of the blue light experiment did not involve our assessments, and they will be reported separately by the ESA investigators who conducted that study. Agreements between the Russian IBMP (who developed and managed the 520-day simulation) and the other international partners supporting science in the simulated mission (e.g., ESA) precluded investigators from complete knowledge about each other's experiments. We do not know the extent to which crewmembers exposed themselves to blue light as scheduled by ESA investigators. To determine if the intended exposure to blue light affected our outcomes, mixed model analyses were used to compare the 60-day period of scheduled blue light exposure (days 439-499) to the 60-day period immediately preceding it (i.e., days 378-438). No statistically significant differences were found between the two 60-day periods in sleep or waking.

**Additional information on crewmember's sleep-wake timing.** Individual differences among crewmembers in the periodicity of their sleep-wake cycles across the mission (Fig. 3) were unrelated to their roles, responsibilities and perceived workload. We sought to determine if they were related to chronotype (i.e., preferred circadian phase for sleep). In particular, we sought evidence of sleep timing pre-mission to determine whether the near-25 h sleep-wake periodicity of crewmember *b* (Fig. 3B), and the biphasic sleep pattern of crewmember *a* (Fig. 3A), both of which developed during the mission, were consistent with an evening chronotype pre-mission (11). Logistical factors beyond our control prevented acquisition of endocrine or genotypic markers of crewmembers' chronotype prior to the mission.

Although subjective chronotype data (i.e., morningness-eveningness scale) were also unavailable, we acquired 2-3 days of behavioral (i.e., Actiwatch) data on

crewmembers between 8 and 16 days before the mission. Table S4 displays these data and the average sleep onset times in each of the first 4 weeks of the mission for each crewmember. Crewmember *b* had a delay of sleep onset of 1 h and 10 min from the first (00:51 h:min) to the second (02:01) night in his pre-mission data, and he took daytime naps on both days. During the first week of mission confinement his sleep onset time averaged 2 h and 30 min—the latest among the crew. It continued to delay an average of 54 min each week during the first month of mission confinement, averaging a sleep onset time of 05:12 in the fourth mission week. These data are consistent with crewmember *b* having an evening chronotype, and a tendency to phase delay, which progressed systematically during the first mission month of environmental confinement (Fig. S7A). The pattern continued throughout the mission (Fig. 3B) and the final 30 days of the mission (Fig. S7B). It is noteworthy that among the crew, only crewmembers *b* and *a* averaged a much later sleep onset time (i.e., 3 h and 22 min, and 1 h and 59 min, respectively) during the first month of the mission than was evident pre-mission. The other four crewmembers had sleep onset times during the first mission month that were comparable to or earlier than their pre-mission sleep onset times (Table S4).

Additional confirmation of the evening chronotype of crewmember *b* was obtained from the post-mission debriefing. Although mission managers confirmed that the crew was selected based on extensive medical and psychological screenings to ensure he had no sleep disorders, in post-mission interviews, crewmember *b* indicated that he was “occasionally” prone to delayed sleep onset times. In response to questioning he indicated that he slept at times in the daytime to compensate for reduced sleep at night; and that he often “goes to bed very late”, especially on holidays. He denied having a circadian rhythm disorder because he did not consider this pattern of sleeping to be unusual for him. We believe it is likely that the evening chronotype of crewmember

**Table S4.** Actigraphically derived sleep onsets of each crewmember on pre-mission days, and weekly average for each of the first 4 weeks of the 520-day mission confinement.

| Crew-member | Sleep onset times 8-16 days pre-mission* |          |          |          |         |         | Sleep onset times during mission |             |             |             |
|-------------|------------------------------------------|----------|----------|----------|---------|---------|----------------------------------|-------------|-------------|-------------|
|             | -16 days                                 | -15 days | -14 days | -10 days | -9 days | -8 days | week 1 mean                      | week 2 mean | week 3 mean | week 4 mean |
| a           | 23:00                                    | 22:49    |          |          |         |         | 00:42                            | 00:11       | 01:24       | 01:16       |
| b           |                                          | 0:51     | 2:01     |          |         |         | 02:30                            | 02:59       | 04:23       | 05:12       |
| c           |                                          |          |          | 1:31     | 2:36    | 1:57    | 00:31                            | 00:31       | 01:22       | 01:18       |
| d           |                                          | 0:14     | 22:24    |          |         |         | 00:01                            | 23:47       | 00:13       | 00:07       |
| e           |                                          |          |          | 0:07     | 0:05    |         | 01:46                            | 01:19       | 01:53       | 01:21       |
| f           |                                          |          |          | 1:15     | 1:43    |         | 01:24                            | 00:57       | 00:46       | 01:09       |
| <b>Mean</b> |                                          |          |          |          |         |         | 01:14                            | 00:33       | 01:43       | 01:49       |

\*Logistical reasons prevented crewmembers from wearing Actiwatchs more than 2-3 days pre-mission.

*b*, in combination with inadequate lighting in the 520-day facility for entrainment of his sleep-wake cycle to a 24-h periodicity, resulted in his continuing to phase delay and manifest a near 25-h sleep-wake periodicity during the mission. This phase-delay tendency of crewmember *b* reflects a vulnerability to inadequate entrainment that was likely present before the mission. The progressively biphasic sleep-wake pattern of crewmember *a* may also have reflected an entrainment problem.

#### Activity levels in the final 20 days of the mission.

The crew was significantly more active during wakefulness in the final 20 days of the mission (days 500-520), relative to both the preceding 60-day blue-light exposure period ( $P = 0.0002$ ), and relative to the 60 days before the blue light exposure period ( $P < 0.0001$ ). The crew also spent more time awake and less time resting and sleeping relative to either of the two 60-day periods during or before the scheduled blue light (all  $P$ 's  $< 0.002$ ). While they increased their wake time and intensity of movement in the final 20 days (Fig. 1A and 1E), they did not demonstrate reliable changes in their sleep onset or offset times, or in their ratings of sleep quality during the final 20 days, relative to the two 60-day periods. Mission

management indicated that the crew's increased waking activity in the final 20 days of the mission reflected no additional work, and the crew's own workload ratings did not increase during the 20 days. Instead, their increased activity in the final 20 days of the mission was associated with personal activities in anticipation of mission end and hatch opening.

**Video evidence of sleepiness during PVT-B performance.** Facial signs of sleepiness using PERCLOS were judged to be present by human scorers and OCR on a total of 51 of the 888 PVT-B 3-min performance tests. Crewmember *f* accounted for 76.4% ( $n=39$ ) of the videos showing sleepiness during performance testing, while crewmember *e* accounted for 19.6% ( $n=10$ ) of the videos. The remaining four crewmembers combined accounted for less than 4% ( $n=2$ ) of the videos showing sleepiness.

#### Ratings of difficulty performing the PVT-B.

Immediately after each PVT-B test bout, crewmembers indicated whether or not it was difficult to perform the task. Crewmember *f* indicated difficulties performing the PVT-B in 25.7% (38/148) of PVT-B test bouts. All other crewmembers indicated difficulty performing the PVT-B on average after only 1.6% (range 0.0% - 4.6%) of the test bouts.

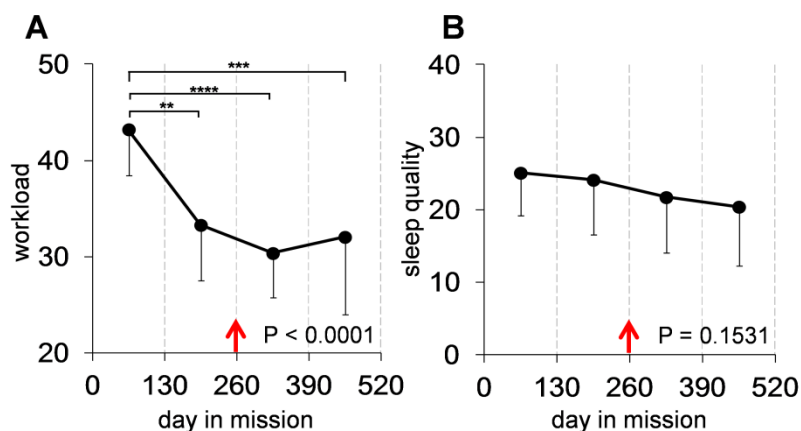

**Fig. S4.** Weekly crew workload and sleep quality visual analog ratings by mission quarter (mean, SE). The simulated mid-mission landing on Mars is indicated by a red arrow. (A) Workload ratings (0 = low workload, 100 = high workload) decreased after the first mission quarter (F test,  $P < 0.0001$ ; post-hoc tests between quarters: \* $P < 0.05$ , \*\* $P < 0.01$ , \*\*\* $P < 0.001$ , \*\*\*\* $P < 0.0001$ ). (B) Sleep quality ratings (0 = good sleep, 100 = poor sleep) did not vary reliably across mission quarters.

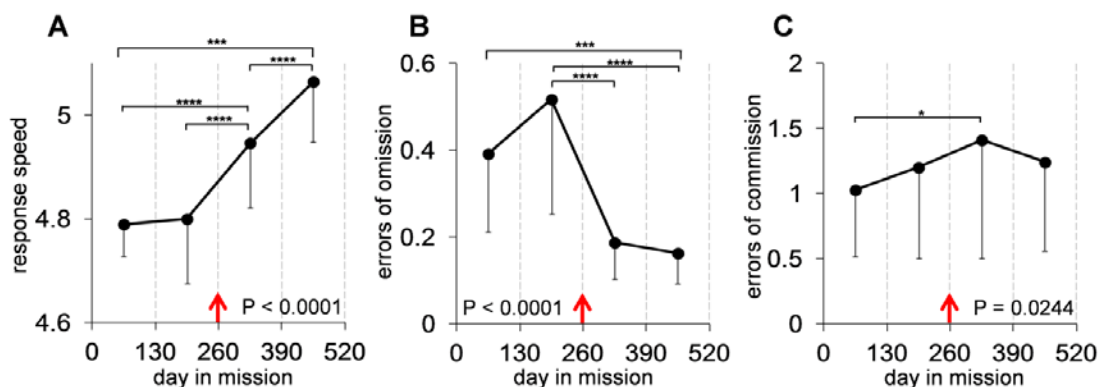

**Fig. S5.** Mean (SE) performance on the weekly Psychomotor Vigilance Test (PVT-B) by mission quarter. The simulated mid-mission landing on Mars is indicated by a red arrow. (A) PVT-B response speed (1/RT) increased (improved) across mission quarters, especially in the second half of the mission (F test,  $P < 0.0001$ ; post-hoc tests between quarters: \* $P < 0.05$ , \*\* $P < 0.01$ , \*\*\* $P < 0.001$ , \*\*\*\* $P < 0.0001$ ). (B) The frequency of PVT-B errors of omission (i.e., lapses of attention) decreased (improved) across mission quarters, especially in the second half of the mission (F test,  $P < 0.0001$ , two-tailed; post-hoc tests between quarters same as in (A)). (C) The frequency of PVT-B errors of commission (i.e., premature responses) increased (worsened) in the third quarter compared to the first quarter, largely due to crewmember *f*.

**Table S5A.** Mean (SE) total sleep time (h) per 24 h for each 130-day mission quarter (MQ)

| <b>Crew-member</b> | <b>MQ1</b>         | <b>MQ2</b>         | <b>MQ3</b>         | <b>MQ4</b>         | <b>Avg (MQ 1-4)</b> |
|--------------------|--------------------|--------------------|--------------------|--------------------|---------------------|
| a                  | 7.57 (0.13)        | 7.56 (0.14)        | 8.04 (0.15)        | 8.61 (0.18)        | 7.94 (0.08)         |
| b                  | 6.97 (0.18)        | 7.51 (0.2)         | 7.80 (0.19)        | 7.91 (0.19)        | 7.55 (0.10)         |
| c                  | 7.21 (0.08)        | 7.02 (0.12)        | 7.32 (0.12)        | 7.45 (0.10)        | 7.25 (0.05)         |
| d                  | 7.53 (0.09)        | 7.71 (0.08)        | 8.00 (0.06)        | 7.91 (0.08)        | 7.79 (0.04)         |
| e                  | 6.61 (0.09)        | 7.04 (0.09)        | 7.52 (0.10)        | 7.89 (0.13)        | 7.26 (0.06)         |
| f                  | 6.80 (0.08)        | 6.55 (0.09)        | 6.33 (0.09)        | 6.48 (0.09)        | 6.54 (0.04)         |
| <b>Avg (a-f)</b>   | <b>7.12 (0.16)</b> | <b>7.23 (0.18)</b> | <b>7.50 (0.26)</b> | <b>7.71 (0.29)</b> |                     |

**Table S5B.** Cumulative total sleep time (h) for each 130-day mission quarter (MQ)

| <b>Crew-member</b>    | <b>MQ1</b>          | <b>MQ2</b>          | <b>MQ3</b>          | <b>MQ4</b>           | <b>Sum (MQ 1-4)</b> |
|-----------------------|---------------------|---------------------|---------------------|----------------------|---------------------|
| a                     | 984.2               | 983.0               | 1045.0              | 1119.0               | 4131.2              |
| b                     | 905.9               | 976.8               | 1014.2              | 1028.8               | 3925.7              |
| c                     | 937.5               | 912.1               | 951.7               | 968.4                | 3769.6              |
| d                     | 979.0               | 1001.8              | 1039.4              | 1028.1               | 4048.4              |
| e                     | 859.5               | 914.6               | 977.0               | 1025.6               | 3776.7              |
| f                     | 884.5               | 851.2               | 823.0               | 842.9                | 3401.6              |
| <b>Sum</b>            | <b>5550.6</b>       | <b>5639.5</b>       | <b>5850.3</b>       | <b>6012.8</b>        |                     |
| <b>Avg (a-f) (SE)</b> | <b>925.4 (20.7)</b> | <b>939.9 (23.3)</b> | <b>975.1 (33.8)</b> | <b>1002.1 (37.4)</b> |                     |

**Table S6A.** Mean (SE) sleep quality\* for each 130-day mission quarter (MQ)

| <b>Crew-member</b> | <b>MQ1</b>  | <b>MQ2</b> | <b>MQ3</b> | <b>MQ4</b> | <b>Avg (MQ1-4)</b> |
|--------------------|-------------|------------|------------|------------|--------------------|
| a                  | 20.5 (9.1)  | 9.4 (5.1)  | 5.8 (5.3)  | 0.6 (0.6)  | 9.2 (3.1)          |
| b                  | 14.2 (3.2)  | 13.2 (2.2) | 12.2 (2.2) | 9.4 (0.6)  | 12.3 (1.1)         |
| c                  | 17.9 (4.2)  | 23.9 (2.8) | 24.2 (1.9) | 22.8 (2.1) | 22.2 (1.5)         |
| d                  | 12.6 (23.5) | 5.0 (7.1)  | 2.1 (6.3)  | 1.7 (5.2)  | 5.4 (1.6)          |
| e                  | 37.2 (4.2)  | 45.3 (4.5) | 35.0 (2.9) | 46.3 (3.8) | 41.1 (2.0)         |
| f                  | 48.3 (4.9)  | 47.9 (3.5) | 51.1 (4.6) | 41.7 (4.1) | 47.3 (2.1)         |
| Avg (a-f)          | 25.1 (5.9)  | 24.1 (7.6) | 21.7 (7.7) | 20.4 (8.2) |                    |

\*Visual analog scale ratings from 0 (good sleep) to 100 (poor sleep)

**Table S6B.** Cumulative sleep quality\* for each 130-day mission quarter (MQ)

| <b>Crew-member</b> | <b>MQ1</b> | <b>MQ2</b> | <b>MQ3</b> | <b>MQ4</b> | <b>Sum (MQ1-4)</b> |
|--------------------|------------|------------|------------|------------|--------------------|
| a                  | 390        | 170        | 110        | 10         | 680                |
| b                  | 270        | 250        | 220        | 170        | 910                |
| c                  | 340        | 430        | 460        | 410        | 1640               |
| d                  | 240        | 90         | 40         | 30         | 400                |
| e                  | 670        | 860        | 630        | 880        | 3040               |
| f                  | 870        | 910        | 970        | 750        | 3500               |
| Avg (a-f) (SE)     | 463 (103)  | 452 (145)  | 405 (145)  | 375 (152)  |                    |

\*Visual analog scale ratings from 0 (good sleep) to 100 (poor sleep)

**Table S7A.** Mean (SE) total PVT-B error\* rates per test for each 130-day mission quarter (MQ)

| <b>Crew-member</b> | <b>MQ1</b>  | <b>MQ2</b>  | <b>MQ3</b>  | <b>MQ4</b>  | <b>Avg (MQ1-4)</b> |
|--------------------|-------------|-------------|-------------|-------------|--------------------|
| a                  | 0.47 (0.10) | 0.36 (0.09) | 0.39 (0.10) | 0.64 (0.13) | 0.47 (0.05)        |
| b                  | 0.37 (0.10) | 0.32 (0.09) | 0.33 (0.10) | 0.44 (0.09) | 0.36 (0.05)        |
| c                  | 0.84 (0.12) | 0.58 (0.15) | 0.45 (0.10) | 0.72 (0.15) | 0.65 (0.07)        |
| d                  | 0.84 (0.14) | 0.72 (0.12) | 0.87 (0.14) | 0.78 (0.14) | 0.80 (0.07)        |
| e                  | 1.17 (0.18) | 2.18 (0.28) | 1.14 (0.19) | 0.84 (0.12) | 1.34 (0.11)        |
| f                  | 4.78 (0.35) | 6.11 (0.35) | 6.39 (0.25) | 5.03 (0.35) | 5.59 (0.17)        |
| Avg (a-f)          | 1.41 (0.68) | 1.71 (0.92) | 1.60 (0.67) | 1.41 (0.73) |                    |

\*Errors of omission (i.e., lapses) plus errors of commission.

**Table S7B.** Cumulative total PVT-B errors\* for each 130-day mission quarter (MQ)

| <b>Crew-member</b> | <b>MQ1</b>  | <b>MQ2</b>  | <b>MQ3</b>  | <b>MQ4</b>  | <b>Sum (MQ1-4)</b> |
|--------------------|-------------|-------------|-------------|-------------|--------------------|
| a                  | 18          | 13          | 15          | 23          | 69                 |
| b                  | 14          | 12          | 12          | 16          | 54                 |
| c                  | 32          | 21          | 17          | 26          | 96                 |
| d                  | 32          | 26          | 33          | 28          | 119                |
| e                  | 42          | 83          | 41          | 32          | 198                |
| f                  | 172         | 232         | 243         | 181         | 828                |
| Avg (a-f) (SE)     | 51.7 (24.4) | 64.5 (35.2) | 60.2 (36.9) | 51.0 (26.1) |                    |

\*Errors of omission (i.e., lapses) plus errors of commission.

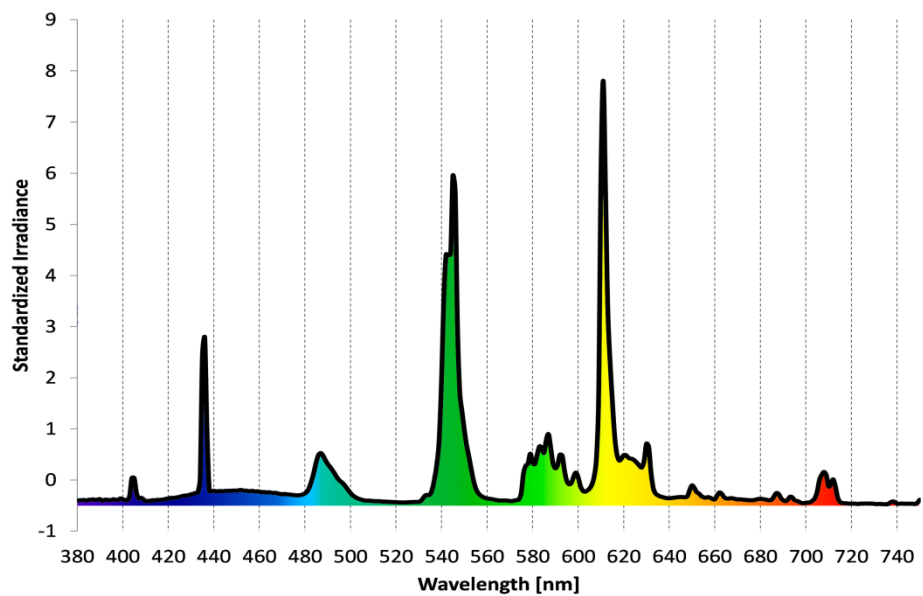

**Fig. S6.** Spectral power distribution of fluorescent lighting in the Mars mission crew facility. Identical distributions were found in all locations throughout the facility. Measurements were made with SpectraRad xpress-BWSpec 3.26 (Minolta).

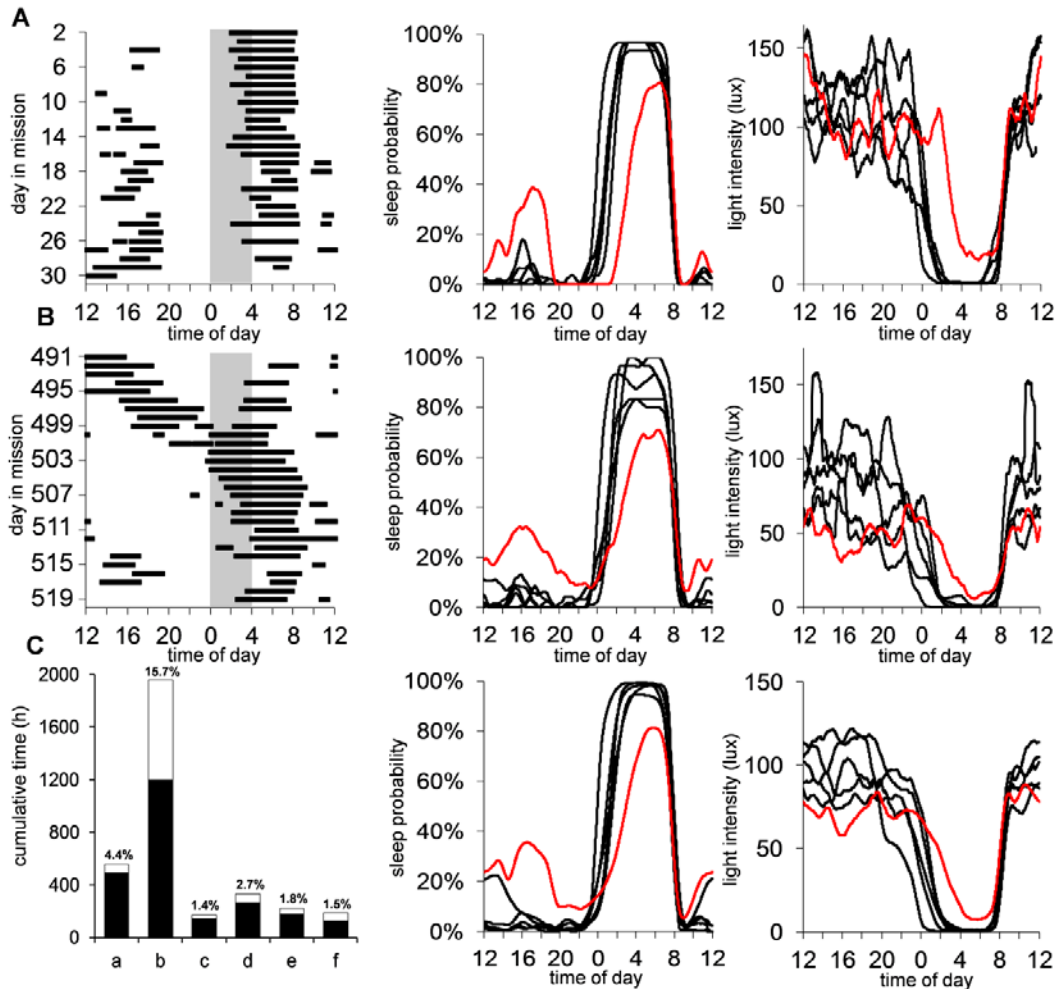

**Fig. S7.** Crewmember *b* sleep periods (black) and wake (active wake plus rest) periods (white), sleep probability and light exposure (measured by actiwatch) by time of day. **(A)** Sleep-wake timing of *b* during the first 30 days of the mission (gray bar for ease of viewing period from 00:00 to 04:00 when room light exposure would be predicted to induce phase delays). For the first 30 days, sleep probability and light exposure occur increasingly later into the night for crewmember *b* (red line) relative to other crewmembers (black lines). Nocturnal sleep onset for *b* drifted later than 04:00 after 16 days in mission. **(B)** Sleep-wake timing of *b* (red line) during the final 30 days of the mission. A near-25-h sleep-wake cycle that became dominant after the first mission quarter and was maintained thereafter is evident in the daily sleep-wake plot, as is at least one long sleep episode (~10 h on day 501). Sleep probability and light exposure by time of day remained different at key times relative to other crewmembers. **(C)** Plots of sleep probability and light exposure by time of day for the entire 520 mission reveal that crewmember *b* (red line) had a different profile from other crewmembers (e.g., sleeping more in the daytime). Bar graph shows the proportion of mission time that each crewmember was asleep when all other crewmembers were awake (black bars), or awake when all other crewmembers were asleep (white bars). The near-25-h sleep-wake cycle of crewmember *b* resulted in 15.7% of mission time (i.e., 1,959 h) when his sleep-wake activity was opposite to other crewmembers.

#### SUPPORTING INFORMATION REFERENCES

1. Ancoli-Israel S, Cole R, Alessi C, Chambers M, Moorcroft W, Pollak CP (2003) The role of actigraphy in the study of sleep and circadian rhythms. *Sleep* 26:342-392.
2. de Souza L, Benedito-Silva AA, Pires MLN, Poyares D, Tufik S, Calil HM (2003) Further validation of actigraphy for sleep studies. *Sleep* 26(1):81-85.

3. Hayes MH (1996) *Statistical Digital Signal Processing and Modelling* (New York: John Wiley & Sons).
4. Lim J, Dinges DF (2008) Sleep deprivation and vigilant attention. *Ann NY Acad Sci* 1129:305-322.
5. Lim J, Dinges DF (2010) A meta-analysis of the impact of short-term sleep deprivation on cognitive variables. *Psychol Bull*, 136(3):375-389.
6. Van Dongen HPA, Maislin G, Mullington JM, Dinges DF (2003) The cumulative cost of additional wakefulness: dose-response effects on neurobehavioral functions and sleep physiology from chronic sleep restriction and total sleep deprivation. *Sleep* 26(2):117-126.
7. Basner M, Mollicone D, Dinges DF (2011) Validity and sensitivity of a brief psychomotor vigilance test (PVT-B) to total and partial sleep deprivation. *Acta Astronaut* 69(11-12):949-959.
8. Basner M, Rubinstein J (2011) Fitness for duty: a 3-minute version of the psychomotor vigilance test predicts fatigue-related declines in luggage-screening performance. *J Occup Env Med* 53(10):1146-1154.
9. Basner M, Dinges DF (2011) Maximizing sensitivity of the psychomotor vigilance test (PVT) to sleep loss. *Sleep* 34(5):581-591.
10. Abe T, Nonomura T, Komada Y, Asaoka S, Sasai T, Ueno A, Inoue Y (2011) Detecting deteriorated vigilance using percentage of eyelid closure time during behavioural maintenance of wakefulness tests. *Int J Psychophysiol* 82(3):269-274.
11. Okawa M, Uchiyama M (2007) Circadian rhythm sleep disorders: characteristics and entrainment pathology in delayed sleep phase and non-24-h sleep-wake syndrome. *Sleep Med Rev* 11(6):485-496.
